# Supplementary material for: P2Y12 Inhibitor Monotherapy after Percutaneous Coronary Intervention
Source: MDPI journal article supplement (doi:10.3390/jcdd9100340), 2022-10-06
Supplement: s1 [file s1]

## **Supplementary appendix**

### **P2Y<sub>12</sub> Inhibitor Monotherapy after Percutaneous Coronary Intervention**

Zhou et al.

#### Table of contents

|                                                                                           |          |
|-------------------------------------------------------------------------------------------|----------|
| <b>Table S1. Prespecified and selected post-hoc analyses of GLOBAL LEADERS trial.....</b> | <b>2</b> |
| <b>Table S2. Prespecified and selected post-hoc analyses of TWILIGHT trial.....</b>       | <b>3</b> |
| <b>Table S3. Prespecified and selected post-hoc analyses of TICO trial .....</b>          | <b>4</b> |

**Table S1. Prespecified and selected post-hoc analyses of GLOBAL LEADERS trial.**

| <b>Sub study</b>                | <b>Domain</b>                                                                                                                              | <b>Findings</b>                                                                                                                                                                                                                                                                |
|---------------------------------|--------------------------------------------------------------------------------------------------------------------------------------------|--------------------------------------------------------------------------------------------------------------------------------------------------------------------------------------------------------------------------------------------------------------------------------|
| Gao et al. <sup>49</sup>        | Regional variation                                                                                                                         | Significant regional variance in the treatment effect of ticagrelor monotherapy was observed, which could be partially explained by the differences in PCI complexity.                                                                                                         |
| Chichareon et al. <sup>50</sup> | Association of sex and outcomes                                                                                                            | Women had a higher risk of bleeding and hemorrhagic stroke 2 years after PCI. Incidence of death and Q-wave MI did not differ between the sexes.                                                                                                                               |
| Tomaniak et al. <sup>51</sup>   | Elderly patients (age $\geq 75$ )                                                                                                          | There was no differential treatment effect of ticagrelor monotherapy found in elderly patients undergoing PCI concerning the rate of all-cause death or new Q-wave MI.                                                                                                         |
| Ono et al. <sup>52</sup>        | BMI with outcome<br>(BMI < 27 vs. BMI $\geq 27$ )                                                                                          | BMI had no significant influence on the treatment effect of ticagrelor monotherapy. A beneficial effect of ticagrelor monotherapy was seen in ACS patients with BMI < 27 kg/m <sup>2</sup> .                                                                                   |
| Chichareon et al. <sup>53</sup> | Diabetic patients                                                                                                                          | Diabetic patients had higher ischemic risk than non-diabetic patients, with similar bleeding risk. No significant differences in ischemic or bleeding outcomes were noticed between ticagrelor monotherapy and ticagrelor-based DAPT.                                          |
| Tomaniak et al. <sup>54</sup>   | Impaired renal function<br>(IRF, eGFR < 60 mL/min/1.73 m <sup>2</sup> )                                                                    | At 2 years, patients with impaired renal function had a significantly higher rate of both ischemic and bleeding events than patients without IRF. There were no differential treatment effects between monotherapy and ticagrelor- DAPT in patients with IRF.                  |
| Kogame et al. <sup>55</sup>     | Bifurcation PCI                                                                                                                            | There were no differences in patients with or without bifurcation PCI between ticagrelor monotherapy and ticagrelor-based DAPT. In patients with bifurcation PCI, ticagrelor monotherapy was associated with a significant reduction in stent thrombosis and increased stroke. |
| Gao et al. <sup>56</sup>        | Radial vs. femoral access                                                                                                                  | At 30 days, there was no significant difference between radial and femoral access in ischemic events. Radial access had a significantly lower bleeding event. In high bleeding risk patients, radial access was associated with a lower ischemic and bleeding risk.            |
| Franzone et al. <sup>57</sup>   | SIHD vs. ACS patients                                                                                                                      | Ticagrelor monotherapy had consistent treatment effects on ischemic endpoint in patient with SIHD and ACS. Net clinical benefit was significant in ACS patients only.                                                                                                          |
| Serruys et al. <sup>58</sup>    | POCE and NACE analysis                                                                                                                     | Ticagrelor monotherapy was not associated with a significant reduction in POCE or NACE.                                                                                                                                                                                        |
| Takahashi et al. <sup>59</sup>  | Long stenting (total stent length $\geq 46$ mm)                                                                                            | Ticagrelor monotherapy was associated with a significant reduction in ischemic risk without differences in bleeding risk and could potentially achieve an optimal NACE.                                                                                                        |
| Chichareon et al. <sup>60</sup> | SYNTAX score                                                                                                                               | Overall discrimination for two-year all-cause mortality of the updated logistic clinical SYNTAX score is either borderline acceptable or helpful. Calibration in the majority of patients is appropriate.                                                                      |
| Serruys et al. <sup>61</sup>    | Complex PCI (defined as multivessel PCI, $\geq 3$ stents, $\geq 3$ lesions, bifurcation with $\geq 2$ stents, or total stent length >60mm) | In patients with complex PCI, ticagrelor monotherapy decreased ischemic risk and POCE; non-significant change of bleeding risk but significantly reduced NACE. Indicated a possible net clinical benefit.                                                                      |

GLOBAL LEADERS, A Clinical Study Comparing Two Forms of Antiplatelet Therapy After Stent Implantation; ACS, acute coronary syndrome; BMI, body mass index; GFR, glomerular filtration rate; IRF, imparted renal function; MI, myocardial infarction; NACE, net adverse clinical events; PCI, percutaneous coronary intervention; POCE, patient-oriented composite endpoints; SIHD, stable ischemic heart disease.

**Table S2. Prespecified and selected post-hoc analyses of TWILIGHT trial.**

| <b>Sub study</b>                | <b>Domain</b>                                 | <b>Findings</b>                                                                                                                                                                                              |
|---------------------------------|-----------------------------------------------|--------------------------------------------------------------------------------------------------------------------------------------------------------------------------------------------------------------|
| Angiolillo et al. <sup>63</sup> | Impact of age                                 | Ticagrelor monotherapy significantly reduced bleeding risk among patients $\geq 65$ years without increasing ischemic events. The beneficial effects are preserved irrespective of age.                      |
| Vogel et al. <sup>64</sup>      | Sex differences and association with outcomes | The higher bleeding risk in women, mostly attributable to baseline differences, is no longer significant after multivariate adjustment. Ischemic events were similar between women and men.                  |
| Han et al. <sup>65</sup>        | Influence of East Asian ethnicity             | Ticagrelor monotherapy reduced bleeding without increasing ischemic events in Chinese patients.                                                                                                              |
| Angiolillo et al. <sup>66</sup> | Impact of diabetes mellitus                   | There was a significant reduction in bleeding outcomes without an increase in ischemic events regardless of the diabetes mellitus status.                                                                    |
| Stefanini et al. <sup>67</sup>  | Impact of chronic kidney disease              | Among CKD patients, ticagrelor monotherapy reduced the risk of bleeding without significantly increasing the ischemic risk.                                                                                  |
| Chiarito et al. <sup>68</sup>   | Patients with prior MI                        | Ticagrelor monotherapy was associated with a significant lower risk of bleeding without increasing ischemic events in patients with prior MI.                                                                |
| Baber et al. <sup>69</sup>      | Patients with ACS                             | Among patients with ACS, ticagrelor monotherapy had a more pronounced benefit of lower bleeding events without increasing ischemic risk.                                                                     |
| Dangas et al. <sup>70</sup>     | Impact of different DES on outcomes           | Ticagrelor monotherapy was associated with reducing bleeding events without increasing ischemic risk, regardless of DES type.                                                                                |
| Escaned et al. <sup>71</sup>    | Outcomes in HBR patients                      | Among HBR patients, ticagrelor monotherapy significantly reduced bleeding events without increasing ischemic risk. The absolute risk reduction in major bleeding was larger in HBR than in non-HBR patients. |

TWILIGHT, Ticagrelor with Aspirin or Alone in High-Risk Patients after Coronary Intervention; CKD, chronic kidney disease; DES, drug-eluting stent; DM, diabetes mellitus; HBR, high bleeding risk; MI, myocardial infarction; NSTE-ACS, non-ST-elevation acute coronary syndrome.

**Table S3. Prespecified and selected post-hoc analyses of TICO trial**

| <b>Sub study</b>         | <b>Domain</b>                                                                                                                    | <b>Findings</b>                                                                                                                                                             |
|--------------------------|----------------------------------------------------------------------------------------------------------------------------------|-----------------------------------------------------------------------------------------------------------------------------------------------------------------------------|
| Yun et al. <sup>73</sup> | Impact of diabetes mellitus                                                                                                      | In diabetic patients, ticagrelor monotherapy had a lower incidence of bleeding without increasing ischemic complications.                                                   |
| Lee et al. <sup>74</sup> | High ischemic risk (defined as $\geq 3$ stents; total stent length $> 60$ mm; bifurcation with 2-stent; or history of DM or CKD) | There were no significant heterogeneities in the effect of ticagrelor monotherapy on outcomes in patients with or without high ischemic risk.                               |
| Lee et al. <sup>75</sup> | Patients with STEMI                                                                                                              | Ticagrelor monotherapy was associated with lower incidence of bleeding without increasing ischemic complications in patients with STEMI.                                    |
| Lee et al. <sup>76</sup> | Outcomes in HBR patients                                                                                                         | Ticagrelor monotherapy associated with lower rate of adverse clinical outcomes regardless of HBR status, with similar magnitudes of therapy effect between HBR and non-HBR. |

TICO, Ticagrelor Monotherapy After 3 Months in the Patients Treated With New Generation Sirolimus-eluting Stent for Acute Coronary Syndrome; CKD, chronic kidney disease; DM, diabetes mellitus; HBR, high bleeding risk; MACCE, major adverse cardiac and cerebrovascular events; STEMI, ST elevation myocardial infarction
